# Supplementary material for: The biosynthetic gene cluster for the cyanogenic glucoside dhurrin in Sorghum bicolor contains its co-expressed vacuolar MATE transporter
Source: PubMed Central journal article supplement (PMC5107947; doi:10.1038/srep37079), 2016-11-14
Supplement: srep37079-s1.pdf [file srep37079-s1.pdf]

## Supplementary information to:

### The biosynthetic gene cluster for the cyanogenic glucoside dhurrin in *Sorghum bicolor* contains its co-expressed vacuolar MATE transporter

Behrooz Darbani, Mohammed Saddik Motawia, Carl Erik Olsen, Hussam H. Nour-Eldin, Birger Lindberg Møller, Fred Rook

## Supplementary methods

### Gene cloning and expression constructs

cDNA was synthesized from RNA extracted from 3-day old etiolated *Sorghum* seedlings using Oligo(dT) priming and SuperScript II Reverse Transcriptase (Invitrogen) according to the manufacturer's instructions. The primers SbMATE-F and SbMATE-R (see Supplementary Table S2) were used to amplify the *SbMATE2* transcript which was cloned into the pCR-Blunt II-TOPO vector using the Zero Blunt TOPO PCR Cloning Kit (Invitrogen). Multiple *SbMATE2* containing plasmids were verified by sequencing to confirm the gene structure. A selected *SbMATE2* clone was used as template to amplify the *SbMATE2* coding region using primers SbMATE-USER-F and SbMATE-USER-R (see Supplementary Table S2), such that it contained the ATG start codon but lacked the stop codon. The fragment was cloned in frame to YFP with USER-based subcloning into pCambia 2300 35S-User\_site-YFP (pLIFE0001). Clone pLIFE001\_35S-SbMATE2-YFP-(3) was transformed to *Agrobacterium tumefaciens* AGL1 for use in transient expression studies. Protoplasts from *Nicotiana benthamiana* transiently expressing the SbMATE2-YFP fusion protein were isolated according to Damm & Willmitzer (1988).

Primer SbMATE-USER-F in combination with primer SbMATE-Xenopus-USER-R (see Supplementary Table S2) were used to amplify the *SbMATE2* coding region and insert it in vector pNB1u (pUSER\_016), cloning it between the T7 promoter and the 3-UTR region of  $\beta$ -globin (see Nour-Eldin *et al.*, 2006). The construct was verified by sequencing and primers F and R (see Supplementary Table S2) were used to amplify the *in vitro* transcription cassette for producing *SbMATE2* mRNA.

### Computational analyses.

The protein structure of SbMATE2 was modelled using the Phyre2 server (<http://www.sbg.bio.ic.ac.uk/phyre2>) following the procedure outlined in Kelley *et al.* (2015) and the model was visualised using the PyMOL Molecular Graphics System (<http://pymol.org/>). Phylogenetic analysis was performed using the MEGA5 program suite (Tamura *et al.*, 2011). Clustal Omega ([www.ebi.ac.uk](http://www.ebi.ac.uk)) was used for multiple sequence alignment.

## Supplementary Figures:

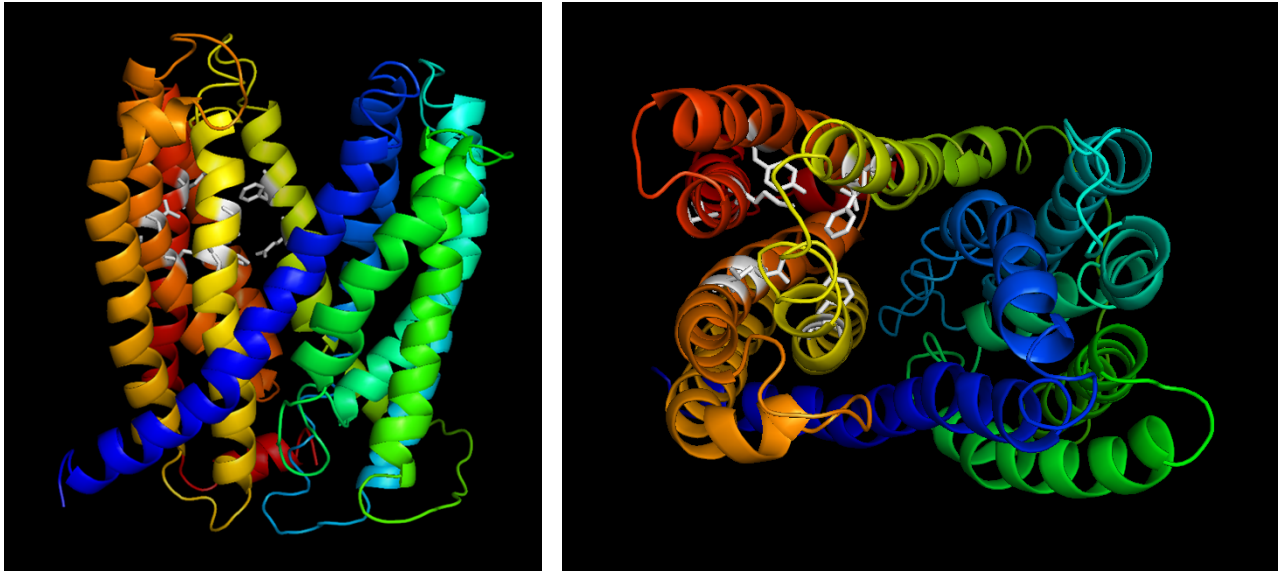

**Figure S1: Structural model of SbMate2 predicted using the Phyre2 web portal.** The model is based on the structure of the MATE transporter NorM from *Vibrio cholerae* (PDB ID: 3MKU) with 100% confidence over 449 residues (90% of the sequence) (He et al. 2010). **(a)** front view. **(b)** view from the vacuolar lumen side with the individual helices TM1 to TM12 numbered. The amino acid residues in TM8 and TM10 - TM12 that form the by Phyre2 predicted cation binding side are shown as stick structures in white. They are E282, F286, G314, F317, T396, N400, Y427, M453 and T458.

```

Norm-VC -----MENVSHRYKKEASNL 15
rbMate1 ---MEA-----PVELG--PGG-RQ--A-----SPERRHWLRCLVLSDFREELRAL 37
Mate1b ---MER-----TEESAPGPGG-AD--A-----ASE-RRGLRCLLLPGFLEELRAL 38
hmATE1 ---MEA-----PEEPAPVRGG-PE--A-----TLE-VRGSRCLRLSAFREELRAL 38
SbMATE2 ---MDSTTPLLQPAPH---GGGSRLEAILEDASVP-WARRAL-----RGAGVELPLL 47
TT12 MSSTETYEP LLTRLHSDSQITERS SPEIEEFLRRRGSTVTPRWWL-----KLAVWESKLL 55
                                         * *

Norm-VC IKLATPVLIASVAQTGMGFVDTIMAGGVS AIDMAAVSIAASI-WLPSILFGVGLLMALVP 74
rbMate1 LVLACPAFLAQLMVFLISFVSSVFCGHLSKLELNAVTLAI AVINVMGVSVGFGLSSACDT 97
Mate1b LVLAGPAFLAQ LMMFLISFISVFCGHLSKLELDAVTLAI AVINVTGISVGHLSACDT 98
hmATE1 LVLAGPAFLVQLMVFLISFISVFCGHLSKLELDAVTLAI AVINVTGVS VGFGLSSACDT 98
SbMATE2 LRIALPAVAVYMINYLMSMTQIFCGQLGNLELAAVSLGNTGIQVFAYGLMLGMGSAVET 107
TT12 WTLSGASIVVSVLNYMLS FVTVMFTGHLSLQLAGAS IATVGIQGLAYGIMLGMAVAVQT 115
      :: . . : : : * : . : : . . . . . . . * : *

Norm-VC VVAQLNGAGRQH KIPFEVHQGLILALLVSVPIIAVLFQTQFIIRFMDVEEAMATKTVGYM 134
rbMate1 LISQTYGSRNLKHVGVILQRSLILLCCLPWALFLNTQH ILLFRQDPVSRLTQTYV 157
Mate1b LISQTYGSRNLKHVGVILQRSLILLCCFPWALFINTEQ ILLFRQDPVSRLTQTYV 158
hmATE1 LISQTYGSRNLKHVGVILQRSAVLVLLCCFPWALFLNTQH ILLFRQDPVSRLTQTYV 158
SbMATE2 LCGQAYGAHKPGMLGVYLQRSTVLLTATGVPLAVAYGFSER IIVFLGESERIAHAAAVFV 167
TT12 VCGQAYGARQYSSMGIICQRAMVLHLAAAVFLTFLYWYSGPILK TMGQSVIAIAHEGQIFA 175
      : .* * : . : . : : : . : * : : . : : :

Norm-VC HAVIFAVPAYLLFQALRSFTDGMSLTKPAMVIGFIGLLNIPLNWIFVYKFGAPELGGV 194
rbMate1 TIFIPALPATFLYTLQVKYLLNQGIVLPQVV TGVAANLVNALANYLFVYQ----LHLGVM 213
Mate1b MIFIPALPAAFLYTLQVKYLLNQGIVLPQIMTGIAANLVNALANYVFLYH----LHLGVM 214
hmATE1 TIFIPALPATFLYMLQVKYLLNQGIVLPQIVTGVAANLVNALANYLFLHQ----LHLGVI 214
SbMATE2 YGLIPQIFAYAAFP IQKFLQAQSIVAPSAY ISTATLALHLALTWLA VDR----LGMGLL 223
TT12 RGMIPQIYAFALACPMQRFLQAQNIVNPLAYMSLGVFLLHTLLTWLV TNV----LDFGLL 231
      .* : * : : : . . * . : : : : : : * : :

Norm-VC GCGVATAIVYWIMLLLLLFLYIVTSKRLAHVKVFETFHKPQPKELIRLFR LFGFPVAAALFF 254
rbMate1 GSALANTVAQFTLALLFLYILRSKVYQ--ATWGGWSLECLQD WASFFRLAIP SMLMLCM 271
Mate1b GSALANTISQFALAIFFLYILWRRLHQ--ATWGGWSWEC LQD WASFFRLAIP SMLMLCI 272
hmATE1 GSALANLISQYTLALLFLYILGKLLHQ--ATWGGWSLECLQD WASFFRLAIP SMLMLCM 272
SbMATE2 GGALVLSLSWWIIVLAQFGYIVTSPRCR--ETWTGFTSQAFHSLG SFFKLSAASAVMLCL 281
TT12 GAALILSFSWWLLVAVNGMYILMSPNCK--ETWTGFSTRAFRGIW PYFKLTVASAVMLCL 289
      * . : . : : ** : . : : : : : : * : :

Norm-VC E V T L F A V V A L L V A P L G S T V V A A H Q V -- A L N F S S L V F M F P M S I G A A V S I R V G H K L G E Q D T K 312
rbMate1 E W W A Y E I G S F L S G I L G M V E L G A Q S V -- T Y E L A I V Y M I P M G L S V A N V R V G N A L G A G N I E 329
Mate1b E W W A Y E V G S F L S G I L G M V E L G A Q S I -- T Y E L A I V Y M I P S G F S V A A N V R V G N A L G A G N I D 330
hmATE1 E W W A Y E V G S F L S G I L G M V E L G A Q S I -- V Y E L A I V Y M V P A G F S V A A S V R V G N A L G A G D M E 330
SbMATE2 E T W Y F Q I L V L I A G L L K N P E L S L D S L S I C M T I N G W V F M I S V G F N A A A S V R V G N E L G A G N P R 341
TT12 E I W Y N Q G L V I S G L L S N P T I S L D A I S I C M Y L N W D M Q F M L G L S A A I S V R V S N E L G A G N P R 349
      * : : . * : . . : . . . . * . : * . : :

Norm-VC G A A I A A N V G L M T G L A T A C I T A L L T V L F R E Q I A L L Y T E N Q V V A L A M Q L L L F A A I Y Q C M D A 372
rbMate1 Q A K K S S A V A L L V T E L I A V V F C V M L L S C K D L V G Y I F T S D R D I I A L V A Q V T P I Y A V S H L F E S 389
Mate1b Q A K K S S A I S L I V T E L F A V T F C V L L L G C K D L V G Y I F T T D R D I V A L V A Q V I P I Y A V S H L F E G 390
hmATE1 Q A R K S S T V S L L I T V L F A V A F S V L L L S C K D H V G Y I F T T D R D I I N L V A Q V V P I Y A V S H L F E A 390
SbMATE2 A A A F S V V V V T S L S L A V A V V C A V V V L C I R D Q L S Y F F T G G E A V A R A V S D L C P L L A V T L V L N G 401
TT12 V A M L S V V V V N I T T V L I S S V L C V I V L V F R V G L S K A F T S D A E V I A A V S D L F P L L A V S I F L N G 409
      * : : : : : : : * . : . : : * : : .

Norm-VC V Q V V A A G S L R G Y K D M T A I F H R T F I S Y W V L G L P T G Y I L G M T N W L T E Q P L G A K G F W L G F I I G 432

```

```

rbMate1      LAGTSGGILR GSGNQKFGAIVNAIGY YVVG LPIGIALMFA-----AKLGVIGLWLGIVV- 443
Mate1b      LACTCGGILR GTGNQKVGAIVNAIGY YVIG LPIGIALMFA-----AKLGVIGLWSGIII- 444
hMATE1      LACTSGGVL R GSGNQKVGAIVNTIGY YVVG LPIGIALMFA-----TTLGVMGLWSGIII- 444
SbMATE2     VQPVLSGVAV GCGWQAFVAYVNVGCY YII G VPLGVFLGFY-----LDLGAKGIWSGMIVG 456
TT12       IQPILSGVAI GSGWQAVVAYVNLVTY YVI G LPIGCVLGFK-----TSLGVAGIWWGMIA- 463
           :   . *   *           .   *:::* * *   *   :           ** . * * * *::

Norm-VC     LSAA-----ALMLGQRLYWLQKQSD DVQLHLAAK----- 461
rbMate1     CAVSQAVCF LGF IARLNWTKACQ-QARVHANLTVNTAS-NGNSAVLPDQPHVGPDSHGG 501
Mate1b      CTTCQTTCF LAF IARLNWKRACQ-QAQVHANLKVNNVAL---NSAVSHEPAHPVCPESHGE 500
hMATE1      CTVFQAVCF LGF I IQLNWKKACQ-QAQVHANLKVNNVPRSGNSALPQDPLHPGCFENLEG 503
SbMATE2     GTMMQTL I LLLWVTSRTDWNKEVE-KARARLDKWDKKQPLED----- 498
TT12       GVILQTLT L I V L T L K T N W T S E V E - N A A Q R V K T S A T E N Q E M A N A G V ----- 507
           : . : * . . . :

Norm-VC     ----- 461
rbMate1     IVLRDADRKE GAELNEQVHP E L P L P V R P E D S A H L S G K Q L A L R R G L L L L G V I L V L L A G I L V 561
Mate1b      IMMTDLEK K D E T Q L D Q P M N Q Q A L P I R P K D S N K L S G K Q L A L R R G L L L L G V V L V L V G G I L V 560
hMATE1      I L T N D V G K T G E P Q S D Q Q M R Q E E P L P E H P Q D G A K L S R K Q L V L R R G L L L L G V F L I L L V G I L V 563
SbMATE2     ----- 498
TT12       ----- 507

Norm-VC     ----- 460
rbMate1     K V Y V R T Q 568
Mate1b      R V Y I R I E 567
hMATE1      R F Y V R I Q 570
SbMATE2     ----- 498
TT12       ----- 507

```

**Figure S2: Multiple sequence alignment of MATE transporters from prokaryotic and eukaryotic origin.** The alignment was generated with Clustal Omega ([www.ebi.ac.uk](http://www.ebi.ac.uk)). The amino acid sequences were obtained from genbank and phytozome and include: NorM-VC from *Vibrio cholera* (Genbank accession: 3MKU\_B), rbMATE1 from *Oryctolagus cuniculus* (NP\_001103289), Mate1b from *Mus musculus* (NP\_080459), hMATE1 from *Homo sapiens* (AAH10661), SbMATE2 from *Sorghum bicolor* (Sobic.001G012600), and TT12 from *Arabidopsis thaliana* (Q9LYT3, At3G59030). Conserved amino acids that form a cation-binding site are highlighted in yellow. Most notably these are in SbMATE2 E282 (E255 in NorM-VC), F286 (F259), F317 (F288), N400 (D371), and Y427 (Y398). See also Figure 4 in He *et al.* 2010.

## Supplementary Tables

| Table S1: <i>Sorghum bicolor</i> publically available RNA-Seq expression data present in the MOROKOSHI database with references to the original literature ( <a href="http://sorghum.riken.jp/morokoshi/">http://sorghum.riken.jp/morokoshi/</a> ) |                      |                                                   |                               |
|----------------------------------------------------------------------------------------------------------------------------------------------------------------------------------------------------------------------------------------------------|----------------------|---------------------------------------------------|-------------------------------|
| Sample number                                                                                                                                                                                                                                      | Sample name          | Tissue and treatment                              | Reference                     |
| 1                                                                                                                                                                                                                                                  | Spikelet             | at anthesis, 5 months after sowing                | Makita <i>et al.</i> , 2014   |
| 2                                                                                                                                                                                                                                                  | Seed                 | 5 months + 2 weeks after sowing                   |                               |
| 3                                                                                                                                                                                                                                                  | Stem                 | 5 months after sowing                             |                               |
| 4                                                                                                                                                                                                                                                  | Infec_C0h            | Control, 0 hours                                  | Yazawa <i>et al.</i> , 2013   |
| 5                                                                                                                                                                                                                                                  | Infec_C12h           | Control, 12 hours                                 |                               |
| 6                                                                                                                                                                                                                                                  | Infec_12h            | Infected, 12 hours                                |                               |
| 7                                                                                                                                                                                                                                                  | Infec_C24h           | Control, 24 hours                                 |                               |
| 8                                                                                                                                                                                                                                                  | Infec_24h            | Infected, 24 hours                                |                               |
| 9                                                                                                                                                                                                                                                  | Nitrogen             | Root tissue, nitrogen stress                      | Gelli <i>et al.</i> , 2014    |
| 10                                                                                                                                                                                                                                                 | Root_ABA             | Roots 9 day seedlings treated with 20 $\mu$ M ABA | Dugas <i>et al.</i> , 2011    |
| 11                                                                                                                                                                                                                                                 | Root_PEG             | Roots 9 day seedl. treated with 20% PEG-8000      |                               |
| 12                                                                                                                                                                                                                                                 | Root_seedling        | Roots 9 day seedlings, untreated                  |                               |
| 13                                                                                                                                                                                                                                                 | Root_NaOH            | Roots 9 day seedlings, treated 0.2 M NaOH         |                               |
| 14                                                                                                                                                                                                                                                 | Shoot_ABA            | Shoots 9 day seedl. treated with 20 $\mu$ M ABA   |                               |
| 15                                                                                                                                                                                                                                                 | Shoot_PEG            | Shoots 9 day seedl. treated with 20% PEG-8000     |                               |
| 16                                                                                                                                                                                                                                                 | Shoot_seedling       | Shoots 9 day seedlings, untreated                 |                               |
| 17                                                                                                                                                                                                                                                 | Shoot_NaOH           | Shoots 9 day seedlings, treated 0.2 M NaOH        |                               |
| 18                                                                                                                                                                                                                                                 | Leaves               | BTx623, 20 day leaves                             | Davidson <i>et al.</i> , 2012 |
| 19                                                                                                                                                                                                                                                 | Inflorescence_emerg  | BTx623, emerging inflorescence                    |                               |
| 20                                                                                                                                                                                                                                                 | Seed_5d_pollination  | BTx623, seed 5 days after pollination             |                               |
| 21                                                                                                                                                                                                                                                 | Inflorescence_early  | BTx623, early inflorescence                       |                               |
| 22                                                                                                                                                                                                                                                 | Pistil               | BTx623, pistil                                    |                               |
| 23                                                                                                                                                                                                                                                 | Embryo               | BTx623, embryo 25 days after pollination          |                               |
| 24                                                                                                                                                                                                                                                 | Endosperm            | BTx623, endosperm 25 days after pollination       |                               |
| 25                                                                                                                                                                                                                                                 | Anther               | BTx623, anther                                    |                               |
| 26                                                                                                                                                                                                                                                 | Seed_10d_pollination | BTx623, seed 10 days after pollination            |                               |

---

## Supplementary Table S2

Sequences of primers used in this study

---

### Primers for cloning the *SbMATE2* (Sobic.001G012600) cDNA clone

SbMATE-F: 5'-CGATCGATCAACGTGCTAGCTTTGC-3'

SbMATE-R: 5'-AGTCTTGTCTAAATGATGATGGCAG-3'

### Primers for USER-based subcloning *SbMATE2* into pCambia 2300 35S-USER\_site-YFP (pLIFE0001)

SbMATE-USER-F 5'-GGCTTAAUATGGACTCGACGACGCCGCT-3'

SbMATE-USER-R: 5'-GGTTAAUCCGTCTTCTAGGAGAGGCTGCTTCTTATCATCCCACT-3'

### Primers for cloning into T7 promoter vector pUSER\_016

SbMATE-USER-F 5'-GGCTTAAUATGGACTCGACGACGCCGCT-3'

SbMATE-Xenopus-USER-R

5'-GGTTAAUTCAAGCGTAATCTGGAACATCGTATGGGTAGTCTTCTAGGAGAGGCTGCTTCTTATCATCCCACT-3'

### Primers for amplification of *in vitro* transcription cassette for producing *SbMATE2* mRNA

F: 5'-TGCAAGGCGATTAAGTTGGGTAACGC -3'

R: 5'-CTCGAGGCGGCCGCCTGCAG-3'

---

## Supplementary references:

- Damm, B. & Willmitzer, L. Regeneration of fertile plants from protoplasts of different *Arabidopsis thaliana* genotypes. *Mol. Gen. Genet.* **213**, 15-20 (1988).
- Davidson, R.M. *et al.* Comparative transcriptomics of three Poaceae species reveals patterns of gene expression evolution. *Plant J.* **71**, 492-502 (2012).
- Dugas, D.V. *et al.* Functional annotation of the transcriptome of *Sorghum bicolor* in response to osmotic stress and abscisic acid. *BMC Genomics* **12**, 514 (2011).
- Gelli, M. *et al.* Identification of differentially expressed genes between sorghum genotypes with contrasting nitrogen stress tolerance by genome-wide transcriptional profiling. *BMC Genomics* **15**, 179 (2014).
- He, X. *et al.* Structure of a cation-bound multidrug and toxic compound extrusion transporter. *Nature* **467**, 991-996 (2010).
- Kelley, L.A. *et al.* The Phyre2 web portal for protein modeling, prediction and analysis. *Nat. Protoc.* **10**, 845-858 (2015).
- Makita, Y. *et al.* MOROKOSHI: transcriptome database in *Sorghum bicolor*. *Plant Cell Physiol.* **56**, e6 (2015).
- Nelson, B.K., Cai, X & Nebenführ A. A multicolored set of in vivo organelle markers for co-localization studies in *Arabidopsis* and other plants. *Plant J.* **51**, 1126-1136 (2007).
- Tamura, K. *et al.* MEGA5: Molecular evolutionary genetics analysis using maximum likelihood, evolutionary distance, and maximum parsimony methods. *Mol. Biol. Evol.* **28**, 2731-2739 (2011).
- Yazawa, T., Kawahigashi, H., Matsumoto, T. & Mizuno, H. Simultaneous transcriptome analysis of sorghum and *Bipolaris sorghicola* by using RNA-seq in combination with *de novo* transcriptome assembly. *Plos One* **8**, e62460 (2013).
